# Supplementary material
Source: Springer Nature journal article supplement (https://www.springermedizin.de/resource/supplementary/12958_2003_107_MOESM8_ESM.pdf/9566134)
Supplement: MOESM8 [file 9566134]

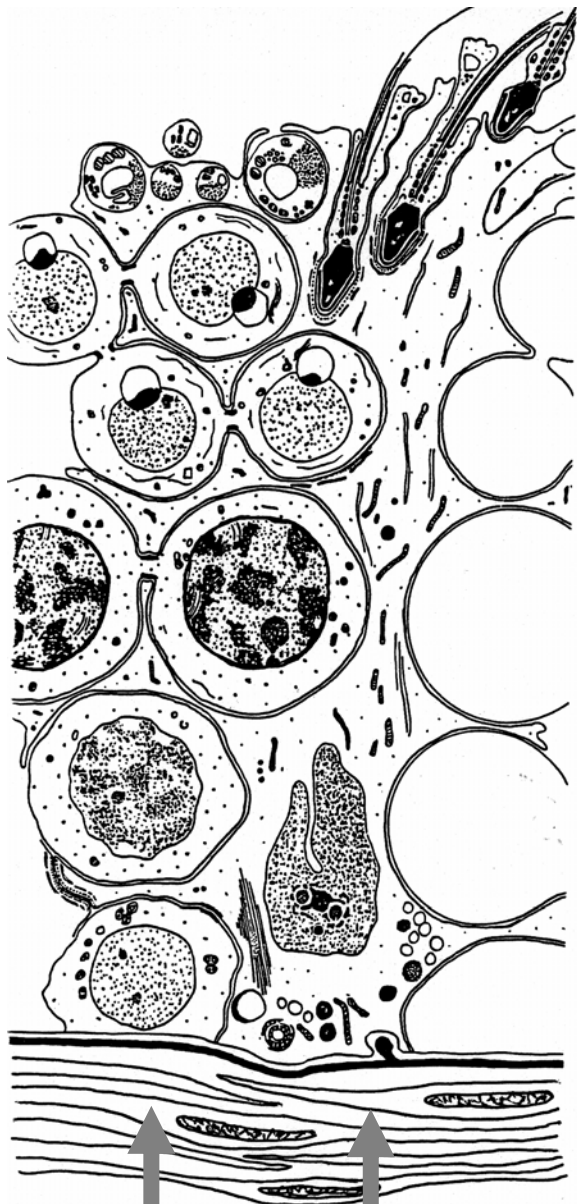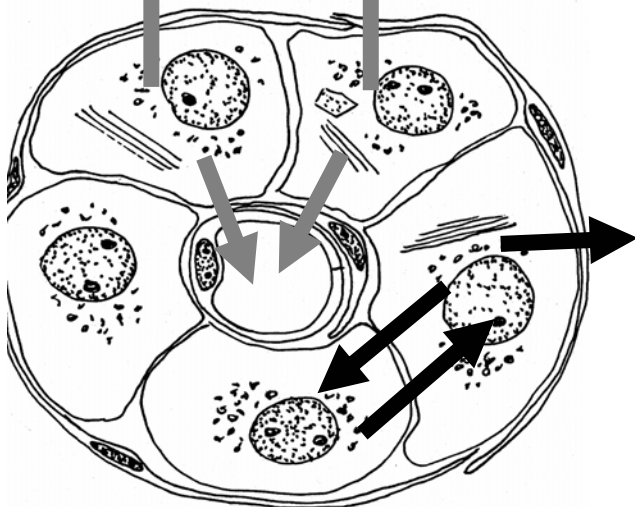

**SPERMATID  
RELEASE**

**SPERMATID  
MATURATION**

**MEIOSIS**

REGULATION  
OF SPERMATO-  
GONIAL PROLI-  
FERATION

**PROLIFERATION OF  
SPERMATOGONIA**

REGULATION OF SPERMATOZOAL  
TRANSPORT

REGULATION OF TESTIS  
BLOOD SUPPLY

**HORMONAL STIMULATION  
BY TESTOSTERONE**

REGULATION OF  
SPERMATID  
RELEASE AND  
PROLIFERATION OF  
SPERMATOGONIA

## **INTRINSIC REGULATION OF GAMETOGENESIS**
